# Supplementary material for: Anogenital Distance and Penile Length in Infants with Hypospadias or Cryptorchidism: Comparison with Normative Data
Source: PubMed Central journal article supplement (PMC3915266; doi:10.1289/ehp.1307178), 2013-12-06
Supplement: ehp.1307178.s001.508.pdf [file ehp.1307178.s001.508.pdf]

**Supplemental Material**  
**Anogenital Distance and Penile Length in Infants with  
Hypospadias or Cryptorchidism: Comparison with  
Normative Data**

Ajay Thankamony, Ngee Lek, Dan Carroll, Martyn Williams, David B. Dunger, Carlo L.

Acerini, Ken K. Ong, and Ieuan A. Hughes

**Supplemental Material, Table S1.** LMS values for anogenital distance and penile length.

| Age (months) | Anogenital distance |       |       | Penile length |       |       |
|--------------|---------------------|-------|-------|---------------|-------|-------|
|              | L                   | M     | S     | L             | M     | S     |
| 0            | 0.546               | 2.002 | 0.293 | 0.278         | 3.059 | 0.148 |
| 1            | 0.571               | 2.210 | 0.287 | 0.282         | 3.157 | 0.149 |
| 2            | 0.597               | 2.411 | 0.280 | 0.285         | 3.249 | 0.150 |
| 3            | 0.623               | 2.595 | 0.274 | 0.288         | 3.330 | 0.151 |
| 4            | 0.648               | 2.754 | 0.267 | 0.291         | 3.398 | 0.152 |
| 5            | 0.674               | 2.887 | 0.261 | 0.294         | 3.454 | 0.152 |
| 6            | 0.700               | 2.997 | 0.255 | 0.297         | 3.499 | 0.153 |
| 7            | 0.726               | 3.085 | 0.250 | 0.300         | 3.537 | 0.154 |
| 8            | 0.752               | 3.156 | 0.245 | 0.303         | 3.568 | 0.154 |
| 9            | 0.777               | 3.213 | 0.240 | 0.306         | 3.595 | 0.155 |
| 10           | 0.803               | 3.257 | 0.235 | 0.309         | 3.619 | 0.155 |
| 11           | 0.829               | 3.291 | 0.231 | 0.312         | 3.644 | 0.155 |
| 12           | 0.855               | 3.320 | 0.228 | 0.315         | 3.670 | 0.156 |
| 13           | 0.880               | 3.344 | 0.225 | 0.318         | 3.699 | 0.156 |
| 14           | 0.906               | 3.364 | 0.222 | 0.322         | 3.732 | 0.156 |
| 15           | 0.931               | 3.381 | 0.220 | 0.325         | 3.767 | 0.156 |
| 16           | 0.956               | 3.395 | 0.218 | 0.328         | 3.803 | 0.157 |
| 17           | 0.982               | 3.406 | 0.217 | 0.331         | 3.839 | 0.156 |
| 18           | 1.007               | 3.413 | 0.215 | 0.334         | 3.873 | 0.156 |
| 19           | 1.032               | 3.418 | 0.214 | 0.337         | 3.904 | 0.156 |
| 20           | 1.057               | 3.422 | 0.213 | 0.340         | 3.933 | 0.155 |
| 21           | 1.081               | 3.424 | 0.212 | 0.343         | 3.960 | 0.155 |
| 22           | 1.106               | 3.426 | 0.211 | 0.346         | 3.984 | 0.154 |
| 23           | 1.131               | 3.426 | 0.211 | 0.349         | 4.007 | 0.153 |
| 24           | 1.156               | 3.424 | 0.210 | 0.352         | 4.029 | 0.152 |

The LMS values can be used to generate standard deviation scores (SDS) for anogenital distance and penile length based on the normative data derived from Cambridge Baby Growth Study. A freely available software, LMSgrowth (Pan and Cole 2012) can be used for this purpose (Cole et al. 2011). The instruction manual included with the software download files provides comprehensive information for deriving SDS using the LMS values.

## References

Cole TJ, Williams AF, Wright CM. 2011. Revised birth centiles for weight, length and head circumference in the uk-who growth charts. *Annals of human biology* 38:7-11.

Pan H, Cole T. 2012. Lmsgrowth, a microsoft excel add-in to access growth references based on the lms method. Version 2.77. Available:

[www.healthforallchildren.com/?product=lmsgrowth](http://www.healthforallchildren.com/?product=lmsgrowth) [accessed 22/07/2013 2013].
